# Supplementary material for: Investigation of the Relationship between Lean Muscle Mass and Erythropoietin Resistance in Maintenance Haemodialysis Patients: A Cross-Sectional Study
Source: MDPI journal article supplement (doi:10.3390/ijerph19095704), 2022-05-07
Supplement: s1 [file s1]

**Supplementary Table S1.** Predictors of haemoglobin levels < 10 g/dL.

| Variables         | Univariate |                  |          | Multivariate |                  |          |         |                  |          |
|-------------------|------------|------------------|----------|--------------|------------------|----------|---------|------------------|----------|
|                   |            |                  |          | Model 1      |                  |          | Model 2 |                  |          |
|                   | b          | OR (95% CI)      | <i>p</i> | b            | OR (95% CI)      | <i>p</i> | b       | OR (95% CI)      | <i>p</i> |
| Age               | 0.85       | 2.35 (0.90–6.14) | 0.082    |              |                  |          |         |                  |          |
| Sex               | −0.70      | 0.50 (0.19–1.29) | 0.151    |              |                  |          |         |                  |          |
| Diabetes mellitus | −0.45      | 0.64 (0.24–1.69) | 0.364    |              |                  |          |         |                  |          |
| Ferritin          | 1.63       | 5.08 (1.80–14.3) | 0.002    | 0.01         | 1.01 (1.00–1.01) | 0.004    | 1.46    | 4.29 (1.40–13.2) | 0.011    |
| MIS               | 1.83       | 6.22 (2.12–18.2) | 0.001    | 0.32         | 1.38 (1.04–1.83) | 0.025    | 1.44    | 4.21 (1.32–13.4) | 0.015    |
| BMI               | −0.23      | 0.79 (0.31–2.02) | 0.624    |              |                  |          |         |                  |          |
| Relative OH       | 1.10       | 3.00 (1.13–7.99) | 0.028    | 0.06         | 1.06 (1.00–1.16) | 0.206    | 0.80    | 2.22 (0.72–6.85) | 0.166    |
| LTI               | 0.56       | 1.76 (0.68–4.53) | 0.243    |              |                  |          |         |                  |          |
| FTI               | 0.85       | 2.35 (0.90–6.14) | 0.082    |              |                  |          |         |                  |          |

BMI, body mass index; FTI, fat tissue index; LTI, lean tissue index; MIS, malnutrition-inflammation score; OH, overhydration. b, logistic regression coefficients; OR, Odds Ratio. Model 1, multivariate logistic regression using continuous variables; Model 2, multivariate logistic regression using groups divided by medium.
